# Supplementary material for: Dissecting conjugation and electronic effects on the linear and non-linear optical properties of rhenium(i) carbonyl complexes
Source: Phys Chem Chem Phys. 2022 Oct 31;24(45):28069–79. doi: 10.1039/d2cp03844g (PMC9682488; doi:10.1039/d2cp03844g)
Supplement: CP-024-D2CP03844G-s001 [file CP-024-D2CP03844G-s001.xlsx]

## Sheet: Calculated 1PA
Supporting Information for:
Dissecting Conjugation and Electronic Effects in the Linear and Non-Linear Optical Properties of Rhenium(I) Carbonyl Complexes
R. J. Fernández-Terán, E. Sucre-Rosales, L. Echevarria, F. E. Hernández
Table S1	Calculated one-photon absorption energies (w) and oscillator strengths (f).																						For the ligands, all states are singlets.
	SINGLET STATES																						SINGLET STATES
#	1a		2a		3a		4a		5a			1b		2b		3b		4b		5b			#	La		Lb
	w (eV)	f	w (eV)	f	w (eV)	f	w (eV)	f	w (eV)	f		w (eV)	f	w (eV)	f	w (eV)	f	w (eV)	f	w (eV)	f			w (eV)	f	w (eV)	f
1	2.8839	0.0095	1.7821	0.0223	2.226	0.0278	2.7473	0.0344	3.0051	0.0134		2.5636	0.3615	1.8573	0.0249	2.3062	0.0332	2.9161	0.1521	2.9488	0.0021		1	4.0029	0.1961	3.1196	0.0003
2	3.0629	0.1116	2.0441	0.0102	2.3013	0.0181	2.935	0.0848	3.0277	0.0051		2.9866	0.015	2.1143	0.0127	2.3854	0.0264	2.9889	0.0036	3.133	0.0476		2	4.231	0.003	3.2388	0.4598
3	3.2907	0.0044	2.2456	0.0025	2.7364	0.1109	3.0158	0.0006	3.1838	0.0499		3.1477	0.3487	2.2769	0.0253	2.6066	0.3194	3.0672	0.2517	3.1746	0.2302		3	4.2762	0.0001	4.0098	0.1072
4	3.6363	0.0116	2.4624	0.0116	3.0202	0.0018	3.19	0.0339	3.1931	0.067		3.1856	0.0132	2.4052	0.3317	2.9249	0.0164	3.1737	0.0117	3.2877	0.0826		4	4.3306	0.375	4.1161	0.3066
5	3.743	0.0084	2.6106	0.1372	3.0761	0.0003	3.2333	0.1549	3.2772	0.2524		3.3766	0.0027	2.5561	0.1288	3.0406	0.0005	3.2151	0.2975	3.5025	0.0085		5	4.4663	0.3331	4.1965	0.001
6	3.8784	0.3014	2.7974	0.0134	3.1764	0.0045	3.2827	0.2132	3.3674	0.0557		3.5315	0.0763	2.5927	0.0035	3.1555	0.0033	3.303	0.1566	3.5399	0.0038		6	4.4749	0.3094	4.2775	0.0106
7	3.9136	0.098	3.1526	0.0673	3.3313	0.1248	3.4034	0.0912	3.5604	0.0216		3.7419	0.0021	2.7699	0.0124	3.2853	0.0539	3.3489	0.4355	3.612	0.0178		7	4.5401	0.0143	4.2805	0.2254
8	3.9992	0.1241	3.2372	0.0162	3.3645	0.1102	3.5788	0.0037	3.599	0.0074		3.8734	0.0218	2.9882	0.0095	3.3319	0.2487	3.4992	0.0561	3.6707	0.0453		8	4.6371	0.0033	4.2916	0.2859
9	4.0606	0.0176	3.3871	0.0276	3.4352	0.0039	3.5827	0.0084	3.619	0.0106		3.915	0.1785	3.1755	0.0648	3.3522	0.0872	3.535	0.0219	3.7653	0.0042		9	4.7263	0.0027	4.3063	0.0322
10	4.0852	0.0618	3.4885	0.0265	3.5713	0.0563	3.6178	0.0053	3.6383	0.0478		3.9406	0.0934	3.2251	0.0088	3.3936	0.2939	3.5914	0.012	3.7708	0.0044		10	4.7933	0.2565	4.5367	0.1367
11	4.1225	0.0157	3.5628	0.0057	3.6017	0.0428	3.7444	0.0004	3.7624	0.0003		4.0299	0.1537	3.4095	0.0273	3.4405	0.0231	3.606	0.0108	3.8498	0.0666		11	4.8615	0.0015	4.5748	0.0008
12	4.2021	0.0075	3.7229	0.0398	3.781	0.0096	3.8178	0.0036	3.8239	0.0062		4.1289	0.0529	3.4782	0.0082	3.4688	0.0631	3.6904	0.0096	3.9056	0.0201		12	4.8747	0.0454	4.6826	0.0009
13	4.2351	0.0067	3.7399	0.0007	3.8087	0.0039	3.8907	0.0147	3.9092	0.0135		4.1434	0.0534	3.5299	0.2072	3.6178	0.1358	3.7285	0.0008	3.9461	0.0049		13	4.9376	0.0012	4.7296	0.4927
14	4.2618	0.0012	3.7855	0.2332	3.9209	0.0013	3.9414	0.0002	3.947	0.0003		4.1468	0.0434	3.5441	0.0015	3.7488	0.0002	3.7502	0.0019	4.0807	0.0081		14	4.9456	0.0244	4.8305	0.0099
15	4.284	0.0109	3.7973	0.2048	3.9932	0.2666	4.0463	0.0005	4.0534	0.0013		4.1593	0.0029	3.6794	0.0098	3.7837	0.0039	3.7919	0.0065	4.0997	0.0083		15	4.9745	0.0021	4.8593	0.0332
16	4.3278	0.017	3.8327	0.0013	4.0447	0.0058	4.056	0.0014	4.0737	0.001		4.2482	0.0116	3.8431	0.2553	3.7882	0.0032	3.8894	0.008	4.1652	0.0047		16	5.1082	0.1191	4.9399	0.0717
17	4.3392	0.0497	3.951	0.154	4.1375	0.0007	4.147	0.0112	4.1722	0.0084		4.2674	0.0067	3.9212	0.2796	3.8985	0.0012	3.9105	0.0003	4.1998	0.1106		17	5.194	0.0016	4.95	0
18	4.3759	0.0023	4.0753	0.0693	4.1758	0.0292	4.1729	0	4.1804	0.0001		4.2739	0.0158	3.9406	0.0088	3.9405	0.0336	3.9623	0.0044	4.2321	0.0019		18	5.2357	0.0036	4.958	0.0006
19	4.4639	0.3479	4.0773	0.0017	4.2495	0.2748	4.3472	0	4.3551	0		4.3013	0.0839	3.9495	0.0104	4.0478	0.0047	4.0592	0.0021	4.2652	0.0101		19	5.273	0.161	5.0244	0.0024
20	4.5533	0.0195	4.0934	0.0275	4.2858	0.0091	4.429	0	4.4754	0.0034		4.3575	0.0274	3.9814	0.2484	4.138	0.0021	4.0662	0.0008	4.2874	0.0145		20	5.2807	0.173	5.0932	0.0843
21	4.5811	0.0568	4.1291	0.1518	4.3272	0.0017	4.4494	0.0011	4.524	0.0012		4.3621	0.0268	4.0026	0.0734	4.1524	0.0072	4.1754	0.0008	4.3107	0.0087		21	5.4285	0.0088	5.2112	0.0008
22	4.6462	0.0046	4.1589	0.0598	4.3757	0.0863	4.4932	0.0223	4.5747	0.0029		4.3773	0.0033	4.0299	0.1823	4.2203	0.1216	4.2056	0.0046	4.5041	0.013		22	5.4961	0.0006	5.2517	0
23	4.6603	0.019	4.2478	0.002	4.4105	0.0131	4.5315	0.5053	4.5967	0.0087		4.3859	0.0188	4.0739	0.0029	4.262	0.0439	4.2508	0.0001	4.5146	0.0001		23	5.4963	0.0119	5.2608	0.0403
24	4.7085	0.031	4.2974	0.0944	4.4937	0.0003	4.5546	0.0474	4.903	0.0109		4.423	0.0402	4.0886	0.0092	4.2944	0.0762	4.3038	0.0171	4.5724	0.0081		24	5.5434	0.0294	5.3501	0.1764
25	4.7168	0.0353	4.3278	0.0001	4.5348	0.0068	4.5738	0.002	5.0539	0.0033		4.5003	0.0534	4.2399	0.0017	4.3241	0.2096	4.3935	0.01	4.5896	0.005		25	5.5523	0.001	5.4749	0.1063
26	4.7431	0.0629	4.3705	0.0003	4.5489	0.0035	4.5958	0.0097	5.0578	0.0039		4.5954	0.0277	4.3205	0.1326	4.3927	0.0791	4.4286	0.0001	4.7706	0.0231		26	5.5558	0.0521	5.4974	0.0552
27	4.7524	0.0509	4.3958	0.0395	4.6203	0.0095	4.6552	0.0095	5.0763	0.0202		4.6058	0.0112	4.3217	0.0521	4.4608	0.0076	4.5086	0.0006	4.9013	0.0163		27	5.6346	0.1321	5.5783	0.0022
28	4.7757	0.0315	4.4258	0.1091	4.6413	0.0031	4.7731	0.0017	5.1294	0.0207		4.6637	0.0256	4.3462	0.012	4.4953	0.0043	4.5361	0.0018	4.9562	0.1638		28	5.6938	0.0353	5.5878	0.0006
29	4.8249	0.1011	4.4299	0.1564	4.6754	0.4795	4.7857	0.0023	5.1655	0.0125		4.6774	0.0613	4.3521	0.0672	4.5184	0.0115	4.5632	0.0028	5.0191	0.0903		29	5.718	0.0006	5.6228	0.0345
30	4.8733	0.0177	4.4843	0.0058	4.7124	0.0041	4.8482	0.0026	5.1964	0.025		4.7179	0.0097	4.3923	0.0382	4.6139	0.0081	4.5845	0.0111	5.0519	0.0448		30	5.7247	0.0217	5.6667	0.0092
	TRIPLET STATES
#	1a		2a		3a		4a		5a			1b		2b		3b		4b		5b
	w (eV)	f	w (eV)	f	w (eV)	f	w (eV)	f	w (eV)	f		w (eV)	f	w (eV)	f	w (eV)	f	w (eV)	f	w (eV)	f
1	2.7446	0	1.6608	0	2.005	0	2.6359	0	2.7602	0		2.1656	0	1.7301	0	2.0807	0	2.5076	0	2.6995	0
2	2.852	0	1.9668	0	2.2334	0	2.7568	0	2.878	0		2.7981	0	2.0212	0	2.2663	0	2.7353	0	2.8366	0
3	3.0401	0	2.0597	0	2.5312	0	2.8246	0	2.9052	0		2.8632	0	2.0336	0	2.3152	0	2.863	0	2.9005	0
4	3.2507	0	2.1991	0	2.8937	0	2.9016	0	2.9778	0		3.0151	0	2.106	0	2.725	0	2.8869	0	3.0887	0
5	3.2892	0	2.4168	0	2.9649	0	2.9604	0	3.0897	0		3.139	0	2.4482	0	2.8724	0	2.9472	0	3.2899	0
6	3.4955	0	2.6998	0	3.0198	0	3.1441	0	3.1488	0		3.3362	0	2.4559	0	2.9021	0	3.047	0	3.4592	0
7	3.598	0	2.9506	0	3.0397	0	3.1573	0	3.4439	0		3.4264	0	2.4807	0	2.9966	0	3.1196	0	3.4768	0
8	3.7009	0	2.9763	0	3.1473	0	3.4247	0	3.5018	0		3.5439	0	2.9044	0	3.0553	0	3.3957	0	3.4877	0
9	3.7289	0	3.0856	0	3.1672	0	3.488	0	3.5567	0		3.6344	0	2.9507	0	3.1344	0	3.4518	0	3.566	0
10	3.8346	0	3.2257	0	3.3219	0	3.545	0	3.5649	0		3.6814	0	3.0119	0	3.257	0	3.4765	0	3.6464	0
11	3.8639	0	3.2985	0	3.3668	0	3.5565	0	3.6284	0		3.711	0	3.1025	0	3.2824	0	3.4893	0	3.677	0
12	3.8959	0	3.3184	0	3.5036	0	3.6207	0	3.6781	0		3.7523	0	3.275	0	3.3886	0	3.5276	0	3.7198	0
13	3.9289	0	3.3193	0	3.5633	0	3.6644	0	3.781	0		3.8238	0	3.2856	0	3.4208	0	3.6028	0	3.7492	0
14	3.96	0	3.4841	0	3.7049	0	3.7786	0	3.8273	0		3.8396	0	3.3084	0	3.5362	0	3.6708	0	3.8184	0
15	3.982	0	3.6642	0	3.721	0	3.8134	0	3.8631	0		3.9453	0	3.3423	0	3.5894	0	3.6734	0	3.8583	0
16	4.0041	0	3.6743	0	3.7643	0	3.839	0	3.9367	0		3.959	0	3.5196	0	3.6361	0	3.7078	0	3.9264	0
17	4.0529	0	3.7782	0	3.7869	0	3.9201	0	3.974	0		3.9664	0	3.5848	0	3.6868	0	3.7665	0	4.0032	0
18	4.0838	0	3.788	0	3.8579	0	3.9656	0	3.9975	0		3.9837	0	3.5975	0	3.7317	0	3.7962	0	4.0371	0
19	4.0935	0	3.8127	0	3.9117	0	3.9957	0	4.0424	0		4.0055	0	3.6013	0	3.7498	0	3.8584	0	4.1083	0
20	4.1149	0	3.8376	0	3.9623	0	4.0093	0	4.1076	0		4.0251	0	3.7982	0	3.7755	0	3.9224	0	4.1332	0
21	4.1702	0	3.8518	0	3.9906	0	4.0663	0	4.1327	0		4.0646	0	3.811	0	3.8396	0	3.9431	0	4.1432	0
22	4.1901	0	3.8701	0	4.0087	0	4.1075	0	4.1591	0		4.0845	0	3.8408	0	3.8612	0	3.9586	0	4.1553	0
23	4.2372	0	3.8811	0	4.0188	0	4.1312	0	4.1843	0		4.1019	0	3.8718	0	3.9641	0	4.0004	0	4.1823	0
24	4.2637	0	3.8931	0	4.0568	0	4.1579	0	4.1927	0		4.1302	0	3.878	0	3.9942	0	4.0765	0	4.2204	0
25	4.3164	0	4.0117	0	4.1623	0	4.1789	0	4.2756	0		4.1557	0	3.8873	0	4.0303	0	4.0883	0	4.2478	0
26	4.3445	0	4.0504	0	4.1923	0	4.1857	0	4.3011	0		4.1832	0	3.8983	0	4.0542	0	4.0992	0	4.2611	0
27	4.3784	0	4.06	0	4.2261	0	4.192	0	4.3155	0		4.2358	0	3.928	0	4.0854	0	4.1232	0	4.2894	0
28	4.4143	0	4.0728	0	4.2458	0	4.2739	0	4.3364	0		4.2669	0	3.9415	0	4.1292	0	4.16	0	4.3022	0
29	4.5211	0	4.0779	0	4.2864	0	4.3003	0	4.3466	0		4.3038	0	4.0301	0	4.1401	0	4.1812	0	4.3155	0
30	4.5525	0	4.1318	0	4.3182	0	4.3282	0	4.3576	0		4.3468	0	4.065	0	4.1425	0	4.1901	0	4.322	0

## Sheet: Calculated 2PA
Supporting Information for:
Dissecting Conjugation and Electronic Effects in the Linear and Non-Linear Optical Properties of Rhenium(I) Carbonyl Complexes
R. J. Fernández-Terán, E. Sucre-Rosales, L. Echevarria, F. E. Hernández
Table S2	Calculated two-photon transition energies (w) and two-photon absorption cross sections (d2PA, in atomic units) for linearly polarized excitation
	Transitions marked in RED have been ignored when generating the convolved 2PA spectra.
#	1a		2a		3a		4a		5a			1b		2b		3b		4b		5b			#	La		Lb
	w (eV)	d2PA (a.u.)	w (eV)	d2PA (a.u.)	w (eV)	d2PA (a.u.)	w (eV)	d2PA (a.u.)	w (eV)	d2PA (a.u.)		w (eV)	d2PA (a.u.)	w (eV)	d2PA (a.u.)	w (eV)	d2PA (a.u.)	w (eV)	d2PA (a.u.)	w (eV)	d2PA (a.u.)			w (eV)	d2PA (a.u.)	w (eV)	d2PA (a.u.)
1	2.17	186	1.4	321	1.8	1030	2.22	2670	2.47	439		2.24	110	1.45	359	1.89	1170	2.4	3580	2.59	33.8		1	4.04	3.75	3.31	1.94
2	2.36	2240	1.7	62.5	1.91	36.3	2.47	9420	2.66	95.5		2.41	1270	1.75	81.9	1.99	54.1	2.62	659	2.81	360		2	4.21	1.06	3.46	18400
3	2.81	107	1.75	992	2.22	3190	2.65	659	2.73	1600		2.86	16800	1.79	1110	2.26	2140	2.64	10200	2.93	1690		3	4.25	2.28	4.13	1110
4	2.91	406	2	365	2.48	372	2.67	8780	2.85	1200		2.89	10300	2.02	101	2.58	381	2.81	4260	2.98	4010		4	4.38	323	4.16	56.9
5	3.01	1250	2.15	823	2.65	288	2.86	813	2.93	1930		3	46.8	2.17	317	2.63	246	2.84	1460	3.03	1250		5	4.5	5.19	4.25	1.42
6	3.14	353	2.18	322	2.7	103	3.01	651	3.02	188		3.09	456	2.2	419	2.82	146	2.98	894	3.07	827		6	4.53	18.6	4.26	1.89
7	3.24	853	2.68	35200	2.88	4290	3.08	2090	3.08	586		3.14	332	2.7	8450	2.93	2820	3.04	1470	3.11	536		7	4.54	1870	4.31	428
8	3.31	115	2.77	8920000	2.94	335	3.09	685	3.1	23.6		3.23	1400	2.75	14400	2.96	463	3.1	6860	3.17	898		8	4.61	80.6	4.34	335
9	3.4	560	2.79	250000000	3.01	265	3.14	6310	3.16	2900		3.4	1920	2.84	52300	3.01	3890	3.15	2980	3.3	1720		9	4.77	25.4	4.4	124
10	3.56	45	2.95	10700	3.04	445	3.18	3010	3.19	5500		3.46	6630	2.85	81600	3.02	879	3.19	2560	3.34	660		10	4.8	68.2	4.54	0.334
11	3.76	28.7	2.95	71.9	3.12	7270	3.31	9.96	3.3	14.8		3.5	12500	2.97	297	3.05	21900	3.36	6.37	3.4	1780		11	4.87	5.8	4.65	113
12	3.79	153	3	25900	3.19	1010	3.44	1810	3.45	1670		3.66	33.3	2.99	2170	3.14	5100	3.43	2890	3.48	96.3		12	4.92	107	4.66	1390
13	3.88	362	3.09	2050	3.22	1030	3.5	790	3.5	440		3.71	423	3.04	14200	3.21	1650	3.49	745	3.51	1950		13	4.93	2.29	4.76	157
14	3.9	3660	3.1	3120	3.33	816	3.55	1080	3.55	797		3.78	113	3.1	1990	3.27	1950	3.57	237	3.53	657		14	4.94	1670	4.89	2.9
15	3.96	783	3.17	140	3.37	2150	3.59	131	3.6	106		3.83	172	3.1	35500	3.33	906	3.6	71.4	3.61	2010		15	4.96	2240	4.93	85.2
16	4.02	254	3.19	55.2	3.55	81.4	3.67	28.6	3.68	7.96		3.91	1630	3.13	2040	3.45	9520	3.66	12500	3.65	95.5		16	5.09	77	4.94	875
17	4.04	704	3.23	4030	3.71	10800	3.76	23.7	3.86	17.7		3.96	2160	3.15	7980	3.51	44.4	3.66	28900	3.79	9.88		17	5.13	1.93	4.95	441
18	4.07	1260	3.33	26600	3.76	2390	3.85	34.4	3.93	49.3		4.03	328	3.28	15000	3.71	5130	3.82	31.9	3.9	332		18	5.17	4.33	4.99	1120
19	4.09	954	3.48	13100	3.87	950	3.86	197	4.1	191		4.07	849	3.34	50.3	3.72	17900	3.88	81.8	4.1	197		19	5.24	302	4.99	212
20	4.14	5820	3.59	122	3.88	8200	3.92	111	4.13	66.2		4.1	36.3	3.42	29400	3.77	161000000	3.9	296	4.25	149		20	5.25	851	5.09	1030
